# Supplementary material for: ≤ Cyclin D1 protein affecting global women’s health by regulating HPV mediated adenocarcinoma of the uterine cervix
Source: PubMed Central journal article supplement (PMC6430791; doi:10.1038/s41598-019-41394-9), 2019-03-22
Supplement: 41598_2019_41394_MOESM1_ESM.pdf [file 41598_2019_41394_MOESM1_ESM.pdf]

## **Cyclin D1 protein affecting global women's health by regulating HPV mediated adenocarcinoma of the uterine cervix**

Richa Tripathi, PhD<sup>1,2</sup>; Gayatri Rath, MS<sup>3</sup>; Poonam Jawanjal<sup>3</sup>, PhD; Mausumi Bharadwaj, PhD<sup>1\*</sup>; Ravi Mehrotra, MD<sup>2\*</sup>

<sup>1</sup>Division of Molecular Genetics & Biochemistry, ICMR-National Institute of Cancer Prevention and Research (NICPR), Noida, India.

<sup>2</sup>Division of Preventive Oncology, ICMR-National Institute of Cancer Prevention and Research (NICPR), Noida, India.

<sup>3</sup>Department of Anatomy, VMMC & Safdarjung Hospital, New Delhi, India.

### **Supplementary Tables**

**Table S1.** Test Performance of Cyclin D1 (nuclear) protein in ADC.

| <b>Parameters (ADC)</b>            | <b>Cyclin D1</b> |
|------------------------------------|------------------|
| <b>Cut-off value (Total score)</b> | 2.0              |
| <b>Sensitivity (%)</b>             | 80               |
| <b>Specificity (%)</b>             | 80               |
| <b>AUC</b>                         | 0.869            |
| <b>p-value</b>                     | <b>*0.0001</b>   |

Abbreviations: ADC, adenocarcinoma; AUC: Area under curve

\*p-value  $\leq$  0.05 is significant

**Table S2.** Pairwise comparison between Cyclin D1 and Notch-3, Cyclin D1 and JAG1, Notch-3 and JAG1

| <b>Proteins</b> | <b>Mean Rank</b> | <b>Sum of Rank</b> | <b>p-value</b> | <b>MannWhitney U test</b> | <b>Wilcoxon test (W)</b> |
|-----------------|------------------|--------------------|----------------|---------------------------|--------------------------|
| <b>HES1</b>     | 16.05            | 321.0              | <b>*0.015</b>  | 111.0                     | 321.0                    |
| <b>Notch-3</b>  | 24.95            | 499.0              |                |                           |                          |
| <b>HES1</b>     | 26.33            | 526.0              | <b>*0.0001</b> | 83.5                      | 293.5                    |
| <b>Jagged-1</b> | 14.68            | 293.0              |                |                           |                          |
| <b>Notch-3</b>  | 28.48            | 569.5              | <b>*0.0001</b> | 40.5                      | 250.5                    |
| <b>Jagged-1</b> | 12.53            | 250.5              |                |                           |                          |

\*p-value  $\leq 0.05$  is significant

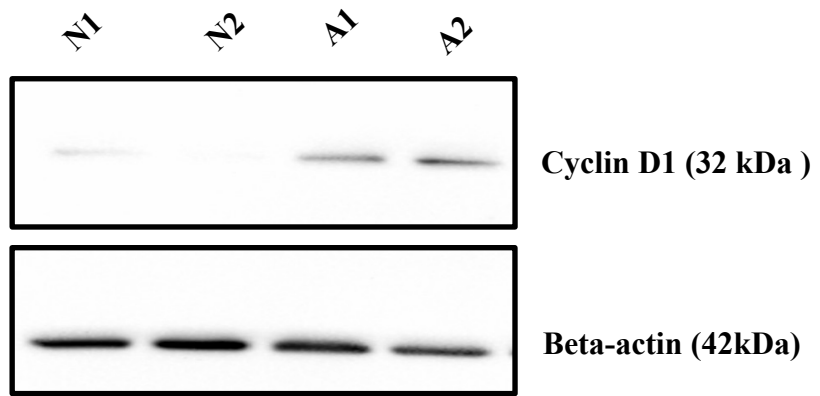

**Figure 2f**

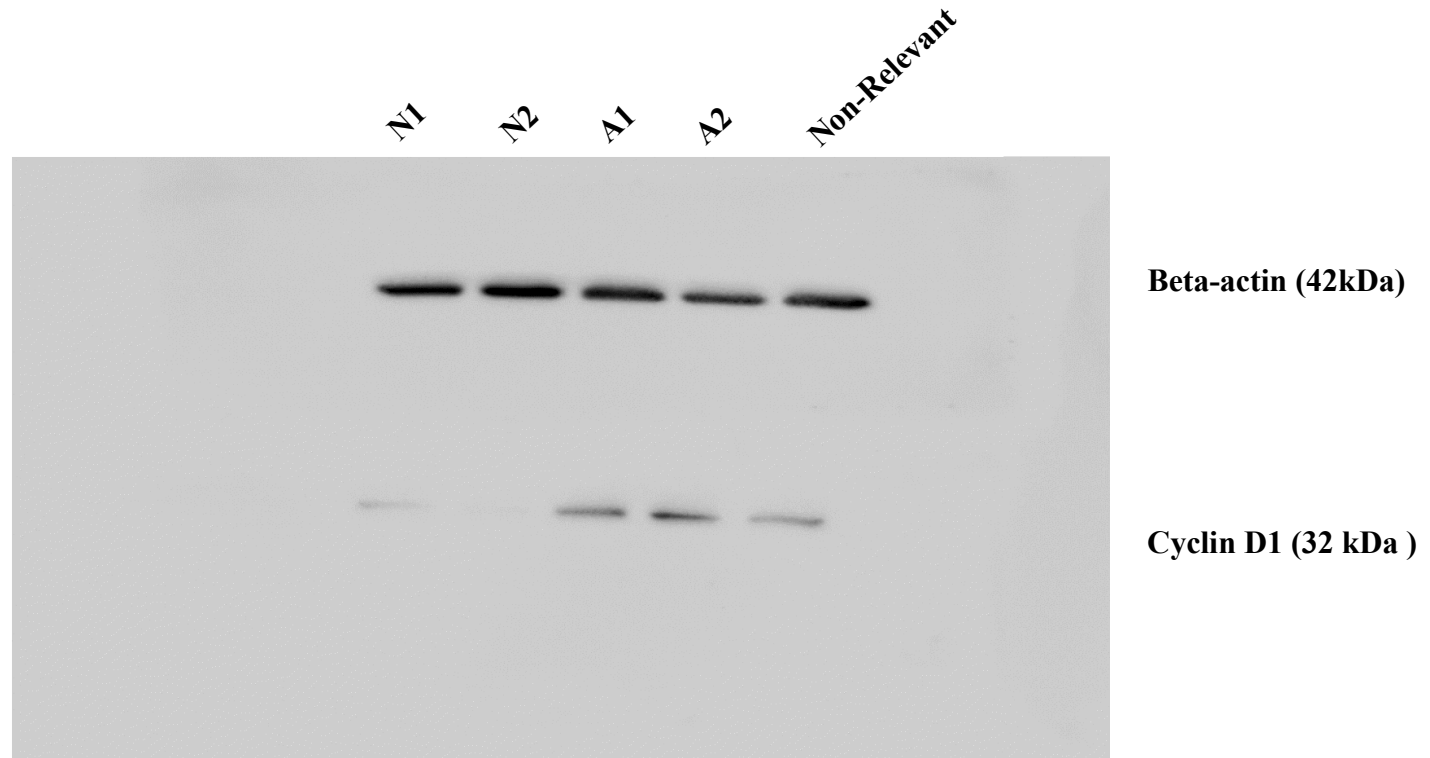

**Figure 2f (Original blot)**
